# Supplementary material
Source: PubMed Central journal article supplement (PMC6679716)
Supplement: EMS83845-supplement-Supplementary_materials.pdf [file EMS83845-supplement-Supplementary_materials.pdf]

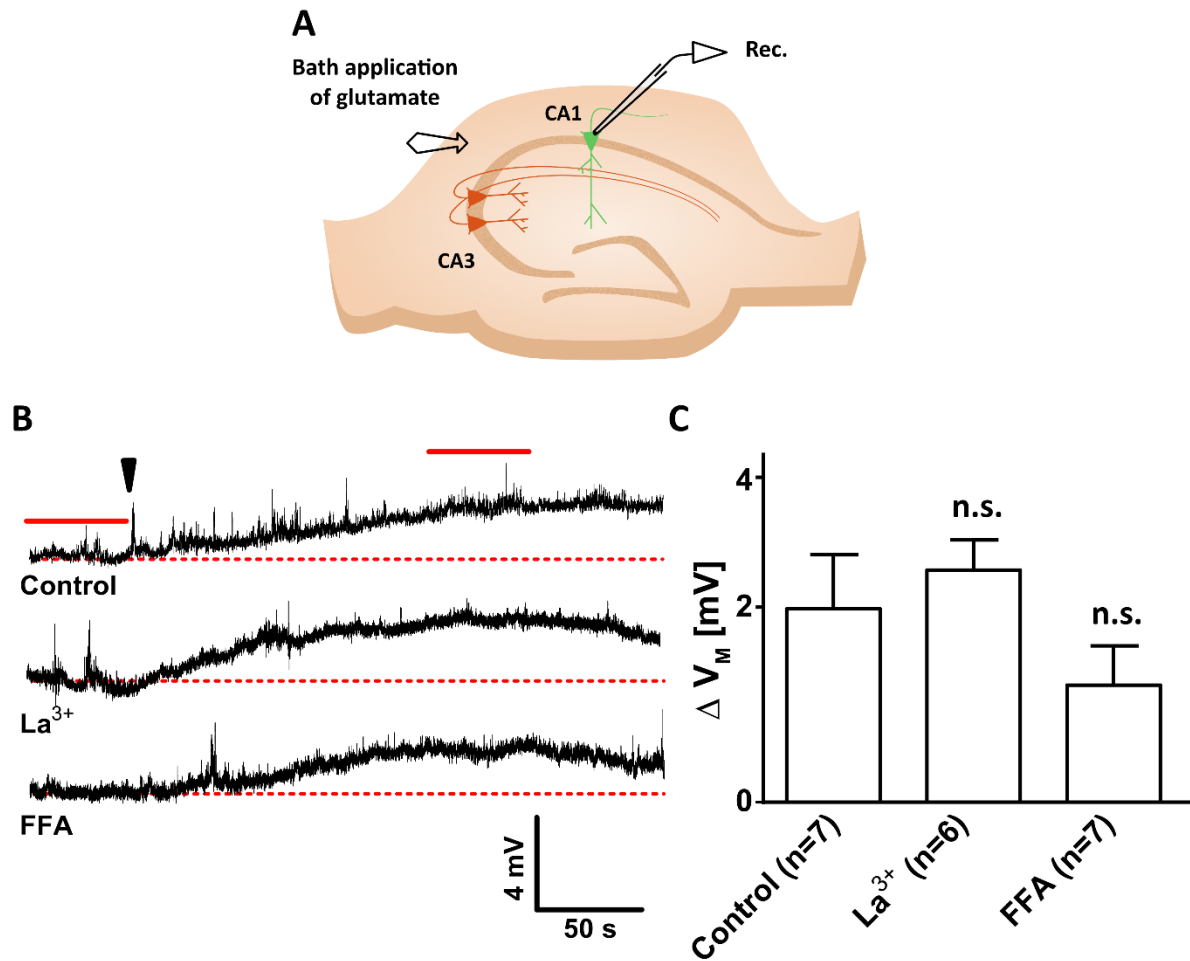

**Supplementary Figure 1 mGluR1-mediated depolarisation unlikely to occur via transient receptor potential (TRP) channel activation.** **A.** Diagram showing the experimental configuration, whole cell current clamp recordings were performed on CA1 pyramidal neurons whilst mGluR1 was pharmacologically isolated and L-glutamate was bath applied. **B.** Representative voltage recordings during application of extracellular glutamate (180 s, black arrow indicates where glutamate enters bath) **C.** columns show mean  $\Delta V_M$  of CA1 pyramidal neurons before and after glutamate perfusion (indicated by red bars in B) for each pharmacological manipulation undertaken. Drugs were added to the bath solution at the following concentrations: La<sup>3+</sup> (100  $\mu$ M), flufenamic acid (FFA) (20  $\mu$ M). Error bars display SEM. n.s. = non-significant difference in mean membrane potential compared to control.

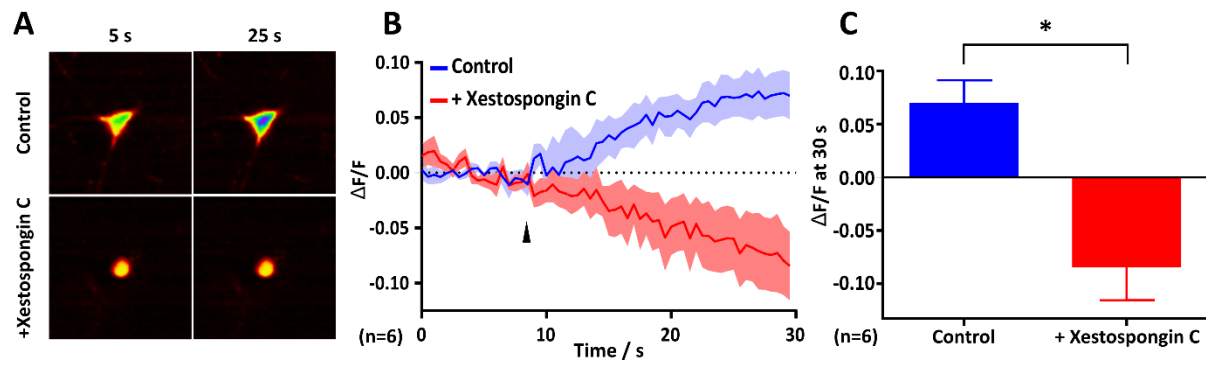

**Supplementary Figure 2 Xestospongine C inhibits somatic IP<sub>3</sub> mediated Ca<sup>2+</sup> release in CA1 pyramidal neurons in the hippocampus.** CA1 pyramidal neurons were filled with the Ca<sup>2+</sup> indicator OGB-1 (1 mM) via patch pipette for one minute. After recovery, a series of confocal images were collected whilst cells were re-patched (at 9 s) with internal solution containing IP<sub>3</sub> (100  $\mu$ M) under control conditions or with pre-incubation with the IP<sub>3</sub> receptor antagonist Xestospongine C (2  $\mu$ M, 20 minutes). **A.** Representative confocal images taken before (5 s) and after break through (25 s). **B.**  $\Delta F/F$  over the imaging time course, break through with IP<sub>3</sub> containing internal solution is shown by the arrow at 9 s. **C.** Columns show mean  $\Delta F/F$  at 30 s. Error bars show SEM (n = 6 for both groups). Significant differences are displayed by asterisks, where \* =  $P < 0.05$ .
